# Supplementary material for: Analysis of 1840 Equine Intraocular Fluid Samples for the Presence of Anti-Leptospira Antibodies and Leptospiral DNA and the Correlation to Ophthalmologic Findings in Terms of Equine Recurrent Uveitis (ERU)—A Retrospective Study
Source: MDPI journal article supplement (doi:10.3390/vetsci9080448), 2022-08-21
Supplement: s1 [file s1]

**Table S1:** Intraocular samples that met the inclusion criteria for the calculation of sensitivity, specificity, positive and negative predictive value.

| Samples from         | MAT          |     | ELISA IgA |     | ELISA IgG |     | ELISA IgM |     | ELISA all tests |     | PCR |     |
|----------------------|--------------|-----|-----------|-----|-----------|-----|-----------|-----|-----------------|-----|-----|-----|
|                      | $\geq 1:100$ | neg | pos       | neg | pos       | neg | pos       | neg | pos             | neg | pos | neg |
| ERU eyes             | 1,064        | 217 | 451       | 98  | 331       | 218 | 124       | 425 | 457             | 92  | 679 | 266 |
| healthy control eyes | 0            | 216 | 0         | 113 | 0         | 113 | 0         | 113 | 0               | 113 | 1   | 213 |

**Table S2:** Presence of anti-Leptospira antibodies and PCR results in intraocular specimens (n= 343) from ERU patients. (pos. = positive; neg. = negative)

| results of laboratory tests      | number positive / number tested | percentage positive |
|----------------------------------|---------------------------------|---------------------|
| MAT pos. + ELISA pos. + PCR pos. | 122/343                         | 35                  |
| MAT pos. + ELISA pos. + PCR neg. | 35/343                          | 10                  |
| MAT pos. + PCR pos. + ELISA neg. | 2/343                           | 1                   |
| ELISA pos. + PCR pos. + MAT neg. | 49/343                          | 14                  |
| only MAT pos.                    | 4/343                           | 1                   |
| only ELISA pos.                  | 81/343                          | 24                  |
| only PCR pos.                    | 50/343                          | 15                  |
